# Supplementary material
Source: PubMed Central journal article supplement (PMC2998138)

**Table 1: RT-PCR Primer Sequences**

|                      |                                   |
|----------------------|-----------------------------------|
| mIL-6 fwd            | CTG ATG CTG GTG ACA ACC AC        |
| mIL-6 rvs            | GCC ACT CCT TCT GTG ACT CC        |
| mNSE fwd             | CAG GAC TTT GTC CGG AAC TAT C     |
| mNSE rvs             | CAG AGT GAC TAT GGC AGG TCA G     |
| mPTHrP fwd           | AAG GGC AAG TCC ATC CAA GA        |
| mPTHrP rvs           | CAG AGT CAG CAG CAC CAA GA        |
| mbeta-actin fwd      | GTG GGG CGC CCC AGG CAC CA        |
| mbeta-actin rvs      | CTT CCT TAA TGT CAC GCA CGA TTT C |
| mGATA3 fwd           | GAT GTA AGT CGA GGC CCA AG        |
| mGATA3 rvs           | CAG GGA TGA CAT GTG TCT GG        |
| mGATA4 fwd           | CTG TGC CAA CTG CCA GAC TA        |
| mGATA4 rvs           | AAG AGT CCT GCT TGG AGC TG        |
| hIL-6 fwd            | GAA CTC CTT CTC CAC AAG CG        |
| hIL-6 rvs            | GAA TCC AGA TTG GAA GCA TCC       |
| hNSE fwd             | TAC CAG GAC TTT GTC AGG GAC T     |
| hNSE rvs             | GAG GAT GAG ACA GAG GTT CCA C     |
| hPTHrP fwd           | ACG ATG CAG CGG AGA CTG GTT       |
| hPTHrP rvs           | CCC TTC TAG CCC ACT CCC AGT CAC   |
| h $\beta$ -actin fwd | GGC ATC GTG ATG GAC TCC           |
| h $\beta$ -actin rvs | GCT GGA AGG TGG ACA GCG           |

\*m=mouse; h=human

**Table 2: Smad shRNA Sequences**

|                       |                                                                                  |
|-----------------------|----------------------------------------------------------------------------------|
| shRNA mSmad1 Set1 fwd | CCG GGC ACT ATT CGG ATG AGC TTC GCT CGA GCG<br>AAG CTC ATC CGA ATA GTG CTT TTT G |
| shRNA mSmad1 Set1 rvs | AAT TCA AAA AGC ACT ATT CGG ATG AGC TTC GCT<br>CGA GCG AAG CTC ATC CGA ATA GTG C |
| shRNA mSmad1 Set2 fwd | CCG GAA AGG AGT CCA CCT TTA TTA CCT CGA GGT<br>AAT AAA GGT GGA CTC CTT TTT TTT G |
| shRNA mSmad1 Set2 rvs | AAT TCA AAA AAA AGG AGT CCA CCT TTA TTA CCT<br>CGA GGT AAT AAA GGT GGA CTC CTT T |

shRNA mSmad1 Set3 fwd    CCG GAC TAC CTC ATG TCA TTT ATT GCT CGA GCA  
ATA AAT GAC ATG AGG TAG TTT TTT G

shRNA mSmad1 Set3 rvs    AAT TCA AAA AAC TAC CTC ATG TCA TTT ATT GCT  
CGA GCA ATA AAT GAC ATG AGG TAG T

shRNA mSmad5 Set1 fwd    CCG GGC AAG TTT CTC ACA GGA AAG GCT CGA GCC  
TTT CCT GTG AGA AAC TTG CTT TTT G

shRNA mSmad5 Set1 rvs    AAT TCA AAA AGC AAG TTT CTC ACA GGA AAG GCT  
CGA GCC TTT CCT GTG AGA AAC TTG C

shRNA mSmad5 Set2 fwd    CCG GGG TGT ACG CTG AGT GTC TTA GCT CGA GCT  
AAG ACA CTC AGC GTA CAC CTT TTT G

shRNA mSmad5 Set2 rvs    AAT TCA AAA AGG TGT ACG CTG AGT GTC TTA GCT  
CGA GCT AAG ACA CTC AGC GTA CAC C

shRNA mSmad5 Set3 fwd    CCG GGC AAC TTT CAC CAT GGC TTC CCT CGA GGG  
AAG CCA TGG TGA AAG TTG CTT TTT G

shRNA mSmad5 Set3 rvs    AAT TCA AAA AGC AAC TTT CAC CAT GGC TTC CCT  
CGA GGG AAG CCA TGG TGA AAG TTG C

shRNA mSmad8 Set1 fwd    CCG GGC CTC AAG GTC TTC AAC AAC CCT CGA GGG  
TTG TTG AAG ACC TTG AGG CTT TTT G

shRNA mSmad8 Set1 rvs    AAT TCA AAA AGC CTC AAG GTC TTC AAC AAC CCT  
CGA GGG TTG TTG AAG ACC TTG AGG C

shRNA mSmad8 Set2 fwd    CCG GGA AAG GGT GTG CAT TTG TAC TCT CGA GAG  
TAC AAA TGC ACA CCC TTT CTT TTT G

shRNA mSmad8 Set2 rvs    AAT TCA AAA AGA AAG GGT GTG CAT TTG TAC TCT  
CGA GAG TAC AAA TGC ACA CCC TTT C

shRNA mSmad8 Set3 fwd    CCG GTT GCC TAC TAC GAA CTA AAC ACT CGA GTG  
TTT AGT TCG TAG TAG GCA ATT TTT G

shRNA mSmad8 Set3 rvs    AAT TCA AAA ATT GCC TAC TAC GAA CTA AAC ACT  
CGA GTG TTT AGT TCG TAG TAG GCA A

\*m=mouse

**Table 3: PCR Primer Sequences**

|                           |                                |
|---------------------------|--------------------------------|
| mIL-6 promoter -300bp fwd | AAC TTC GTG CAT GAC TTC AG     |
| mIL-6 promoter -150bp rvs | ACT AGG GGG AAA AGT GCA G      |
| mIL-6 promoter -150bp fwd | TGT GTC TTG CGA TGC TAA AGG    |
| mIL-6 promoter -50bp fwd  | TTA TCA AAT GTG GGA TTT TCC CA |
| mIL-6 promoter rvs        | GGG CTC GAG GGC AGA ATG        |

\*m=mouse

## Supplementary Figure Legends

**Figure 1.** Induction of IL-6 expression by BMP-6 in THP-1 human monocyte cell line. As with RAW 264.7 and murine peritoneal macrophages, BMP-6 at 100 ng/ml induced IL-6 mRNA expression.

**Figure 2.** Knock-down of R-Smads by shRNA lentivirus. Clone #1 for Smad 1, #3 for Smad 5, and #1 for Smad 8 were selected for further studies.

**Figure 3.** Effect of SB203580 on phosphorylation of Smad1/5 by BMP-6. After pretreatment with increasing concentrations of SB203580 for 1h, cells were treated with 100 ng/ml BMP-6 for 1h. Immunoblot revealed that up to 10 $\mu$ M, SB203580 did not affect BMP6-induced phosphorylation of Smad1/5.

**Figure 4.** Knock-down of GATA4 by siRNA. RAW 264.7 was transfected with control, GATA3, and GATA4 siRNA. Semi-quantitative RT-PCR was used to measure the effect on the expression levels of GATA3 and GATA4 mRNA. The knockdown of GATA4 by siGATA4 was specific as there was no significant effect on GATA3 mRNA expression level.

**Figure 5.** Effect of dominant-negative GATA 4 (GATA4DN) on IL-6 expression in macrophages. Following transfection with GATA4DN, baseline induction of IL-6 was observed, suggesting that the transfection process itself can influence IL-6 expression. When treated with BMP-6, induction of IL-6 was no longer observed in cells expressing GATA4DN.

**Lee GT et al**  
**Supplementary Fig 1**

**IL-6 induction by BMP-6 in THP-1 cells**

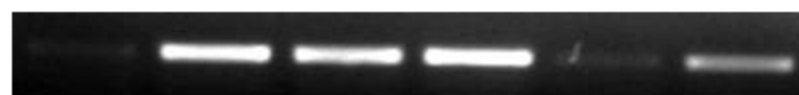

|              |   |   |   |   |   |   |
|--------------|---|---|---|---|---|---|
| <b>TPA</b>   | - | + | - | + | - | + |
| <b>LPS</b>   | - | - | - | - | + | + |
| <b>BMP-6</b> | - | - | + | + | - | - |

**Lee GT et al**  
**Supplementary Fig 2**

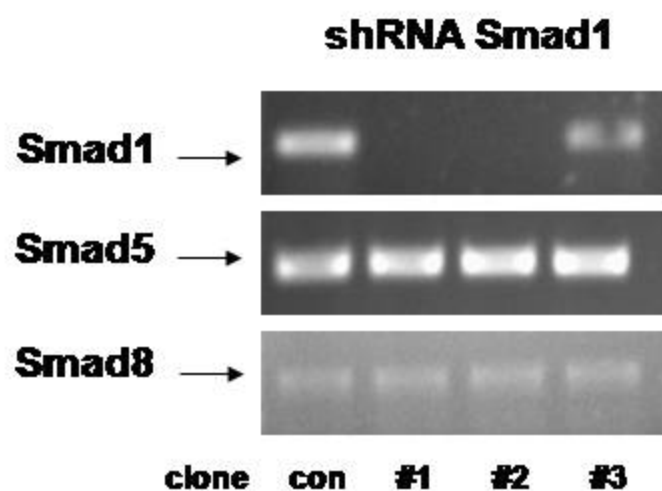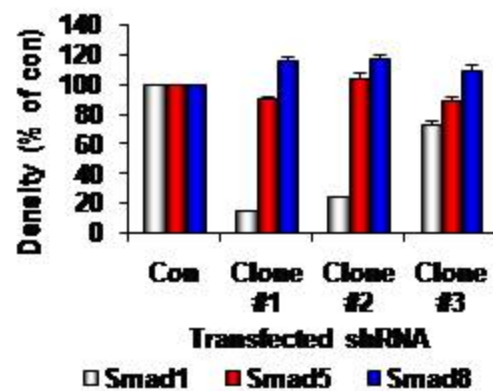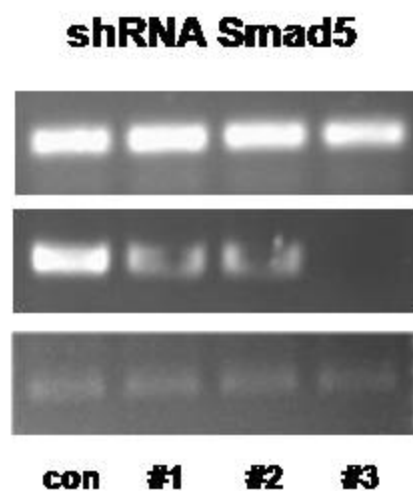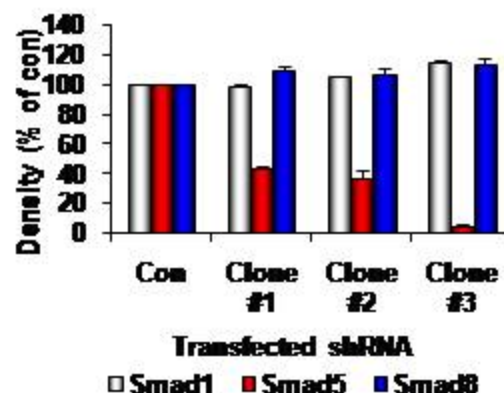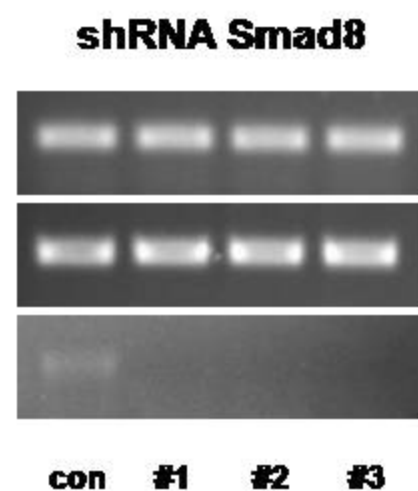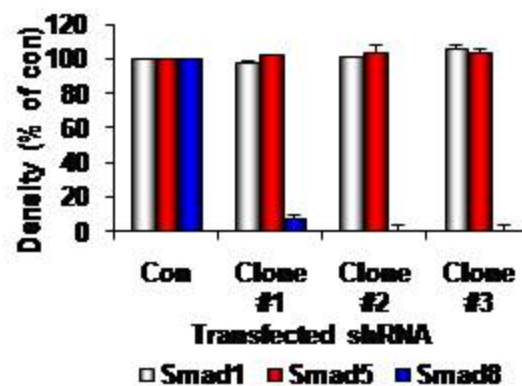

**Lee GT et al**  
**Supplementary Fig 3**

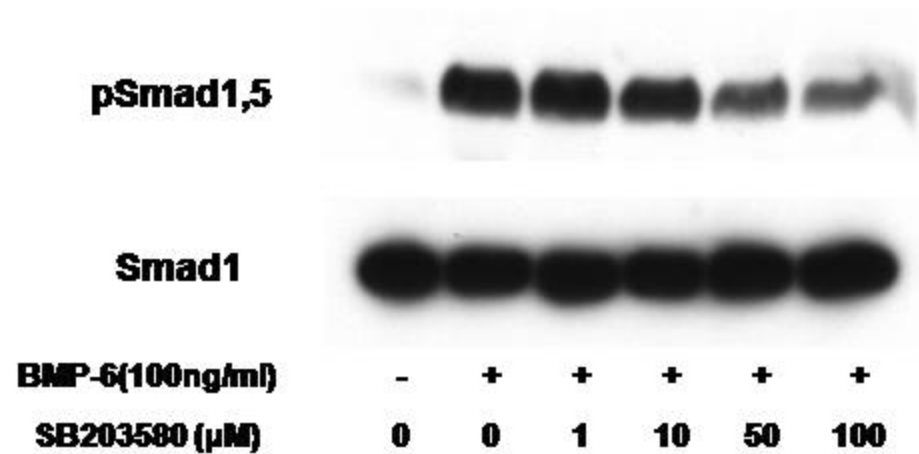

**Lee GT et al**  
**Supplementary Fig 4**

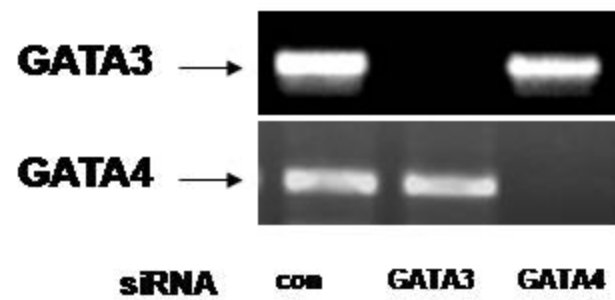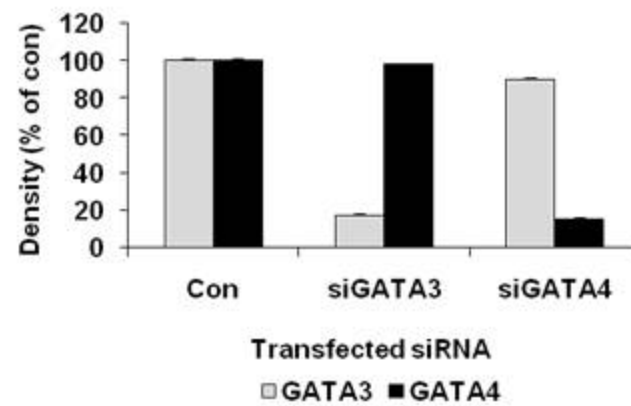

Supplement: supp_M110.103705_jbc.M110.103705-1.pdf [file supp_M110.103705_jbc.M110.103705-1.pdf]
